# Supplementary material
Source: publisher figshare collection journal article supplement (https://tandf.figshare.com/articles/dataset/_/4748326)
Supplement: Supplementary file 1 [file 1]

Supplement to “Pairwise Estimation of Multivariate Gaussian Process Models With Replicated Observations: Application to Multivariate Profile Monitoring”

Yongxiang Li, Qiang Zhou\*, Xiaohu Huang, Li Zeng

\*corresponding author email: [q.zhou@arizona.edu](mailto:q.zhou@arizona.edu)

## A. PROPOSITIONS

**Proposition 1.** Under the usual regularity conditions, as  $n \rightarrow \infty$ , estimates of the augmented parameters in  $\Theta^*$  are consistent, i.e.,  $\hat{\Theta}^* \xrightarrow{p} \Theta^*$ , and

$$\sqrt{n}(\hat{\Theta}^* - \Theta^*) \sim N(\mathbf{0}, \mathbf{H}^{-1} \mathbf{J} (\mathbf{H}^{-1})^T) \quad (\text{A.1})$$

where  $\mathbf{H}$  is a lower triangular block matrix with blocks  $\mathbf{H}_{p,q}$  and  $\mathbf{J}$  is a symmetric matrix containing blocks  $\mathbf{J}_{p,q}$ , given by

$$\begin{cases} \mathbf{H}_{[p,q]} = E \left[ -\partial U_{[p]}(\Theta_{[p]}; \mathbf{y}_{[p]} | \Theta_{[1]}, \dots, \Theta_{[p-1]}) / \partial \Theta_{[q]}^T \right], \text{ for } q \leq p \\ \mathbf{J}_{[p,q]} = E \left[ U_{[p]}(\Theta_{[p]}; \mathbf{y}_{[p]} | \Theta_{[1]}, \dots, \Theta_{[p-1]}) U_{[q]}^T(\Theta_{[q]}; \mathbf{y}_{[q]} | \Theta_{[1]}, \dots, \Theta_{[q-1]}) \right] \end{cases} \quad (\text{A.2})$$

or equivalently

$$\begin{cases} \mathbf{J}_{[p,q]} \quad (p \neq q) = \begin{bmatrix} \mathbf{F}_{[p]}^T \mathbf{C}_{[p]}^{-1} \mathbf{C}_{[p,q]} \mathbf{C}_{[q]}^{-1} \mathbf{F}_{[q]} & \mathbf{0} \\ \mathbf{0} & \frac{1}{2} \text{tr} \left( \mathbf{C}_{[q]}^{-1} \mathbf{C}_{[p,q]}^T \mathbf{C}_{[p]}^{-1} \frac{\partial \mathbf{C}_{[p]}}{\partial \Psi_{[p]}} \mathbf{C}_{[p]}^{-1} \mathbf{C}_{[p,q]} \mathbf{C}_{[q]}^{-1} \frac{\partial \mathbf{C}_{[q]}}{\partial \Psi_{[q]}^T} \right) \end{bmatrix} \\ \mathbf{H}_{[p,p]} = \mathbf{J}_{[p,p]} = \begin{bmatrix} \mathbf{F}_{[p]}^T \mathbf{C}_{[p]}^{-1} \mathbf{F}_{[p]} & \mathbf{0} \\ \mathbf{0} & \frac{1}{2} \text{tr} \left( \mathbf{C}_{[p]}^{-1} \frac{\partial \mathbf{C}_{[p]}}{\partial \Psi_{[p]}} \mathbf{C}_{[p]}^{-1} \frac{\partial \mathbf{C}_{[p]}}{\partial \Psi_{[p]}^T} \right) \end{bmatrix} \\ \mathbf{H}_{[p,q]} \quad (p > q) = \begin{bmatrix} \mathbf{0} & \mathbf{0} \\ \mathbf{0} & \frac{1}{2} \text{tr} \left( \mathbf{C}_{[p]}^{-1} \frac{\partial \mathbf{C}_{[p]}}{\partial \Psi_{[p]}} \mathbf{C}_{[p]}^{-1} \frac{\partial \mathbf{C}_{[q]}}{\partial \Psi_{[q]}^T} \right) \end{bmatrix} \end{cases} \quad (\text{A.3})$$

**Proof:** Clearly, if  $s_p = 1$  and  $r_p = 2, 3, \dots, k$  (this corresponds to  $p = 1, 2, \dots, k-1$ ),

$\hat{\Theta}_{[p]}$  is a consistent estimator because it falls into a regular maximum likelihood estimation framework. Next we prove that, for  $s_p > 1$  (i.e.,  $p \geq k$ ), the estimator  $\hat{\Theta}_{[p]}$  obtained by maximizing the conditional likelihood  $L_{[p]}(\Theta_{[p]}; \Upsilon_{[p]} | \hat{\Theta}_{[1]}, \dots, \hat{\Theta}_{[p-1]})$  is

consistent, given the consistency of all  $\hat{\Theta}_{[i]}$ 's with  $i < p$ .

Since  $\hat{\Theta}_{[i]} \xrightarrow{p} \Theta_{[i]}$  with  $i < p$ , then  $\hat{v}_{[p]} \xrightarrow{p} v_{[p]}$ . Recall that  $T_{[p]} = \zeta_{[p]}(u_{[p]})$  and  $u_{[p]} = v_{[p]} \cup \{\omega_{[p]}\}$ . Define another function  $\omega_{[p]} = \tilde{\zeta}_{[p]}(T_{[p]}, v_{[p]})$ . With fixed  $v_{[p]}$ ,  $\zeta_{[p]}(u_{[p]}) = \zeta_{[p]}(v_{[p]}, \omega_{[p]})$  is monotonically decreasing with  $\omega_{[p]}$  based on relationships from the HD, i.e.,  $\zeta_{[p]}(v_{[p]}, \pi) < \zeta_{[p]}(v_{[p]}, \omega_{[p]}) = T_{[p]} < \zeta_{[p]}(v_{[p]}, 0)$ .

Define the following events

$$\begin{aligned} A &= \left\{ T_{[p]} \in \left[ \zeta_{[p]}(\hat{v}_{[p]}^{(n)}, \pi), \zeta_{[p]}(\hat{v}_{[p]}^{(n)}, 0) \right] \right\}, \\ A^c &= A_1^c \cup A_2^c = \{T_{[p]} < \zeta_{[p]}(\hat{v}_{[p]}^{(n)}, \pi)\} \cup \{T_{[p]} > \zeta_{[p]}(\hat{v}_{[p]}^{(n)}, 0)\}, \\ B_1 &= \left\{ \zeta_{[p]}(\hat{v}_{[p]}^{(n)}, \pi) - \zeta_{[p]}(v_{[p]}, \pi) > a \right\}, \\ B_2 &= \left\{ \zeta_{[p]}(v_{[p]}, 0) - \zeta_{[p]}(\hat{v}_{[p]}^{(n)}, 0) > a \right\}, \\ C &= \left\{ |\hat{T}_{[p]}^{(n)} - T_{[p]}| > a \right\}. \end{aligned}$$

where  $\hat{v}_{[p]}^{(n)} / \hat{T}_{[p]}^{(n)}$  denotes the estimate is based on a sample of size  $n$ .

Since  $\hat{v}_{[p]} \xrightarrow{p} v_{[p]}$  and  $\zeta_{[p]}$  is a continuous function, then for any  $a$  satisfying  $0 < a < M$ , where  $M = \min(T_{[p]} - \zeta_{[p]}(v_{[p]}, \pi), \zeta_{[p]}(v_{[p]}, 0) - T_{[p]})$ , and any  $\varepsilon > 0$ , there must exist a common  $N_1(\varepsilon) > 0$ , such that for any sample size  $n_1 > N_1(\varepsilon)$ ,

$$\Pr(B_1) < \varepsilon / 4 \quad \text{and} \quad \Pr(B_2) < \varepsilon / 4.$$

Since  $A_1^c \subset B_1$  and  $A_2^c \subset B_2$ , we have  $A^c \subset \{B_1 \cup B_2\}$ . In addition with  $T_{[p]} = \zeta_{[p]}(v_{[p]}, \omega_{[p]})$ , we have  $\Pr(A^c) < \varepsilon / 2$  for any sample size  $n_1 > N_1(\varepsilon)$ . Since

$$P(C) = P(C|A)P(A) + P(C|A^c)P(A^c),$$

it immediately follows that  $\Pr(C) < \Pr(C|A) + \Pr(A^c)$ . It is noted that  $\hat{T}_{[p]}$  can be consistently estimated from  $L_{[p]}(\Theta_{[p]}; \Upsilon_{[p]} | \hat{\Theta}_{[1]}, \dots, \hat{\Theta}_{[p-1]})$  if  $A$  is true (in this case, it is possible that  $\hat{T}_{[p]} = T_{[p]}$  even if  $\hat{\omega}_{[p]} \neq \omega_{[p]}$  with given  $\hat{v}_{[p]}$ ). Hence there exists an

$N_2(\varepsilon) \geq N_1(\varepsilon)$ , such that for any sample size  $n_2 > N_2(\varepsilon)$ ,  $\Pr(C|A) < \varepsilon/2$  and thus  $\Pr(C) < \varepsilon$ , where the choice of  $n_2$  is independent of  $n_1$ . Therefore, for any  $a$  satisfying  $0 < a < M$ , and any  $\varepsilon > 0$ , there exists an  $N = N_2(\varepsilon)$ , such that for any sample size  $n > N$ ,

$$P\left(\left|\hat{T}_{[p]} - T_{[p]}\right| > a\right) < \varepsilon.$$

Thus  $\hat{T}_{[p]}$  is a consistent estimator. By the continuous mapping theorem,  $\hat{\omega}_{[p]} = \tilde{\zeta}_{[p]}(\hat{T}_{[p]}, \hat{v}_{[p]})$  is also consistent. All other parameters in  $\Theta_{[p]}$  are estimated consistently, which is straightforward from the regular maximum likelihood estimation. Therefore  $\hat{\Theta}_{[p]}$  and hence  $\hat{\Theta}^*$  are consistent.

Now we prove the asymptotic normality. By applying the Taylor series expansion of the score function  $U_{[p]}(\hat{\Theta}_{[p]}; \mathbf{Y}_{[p]} | \hat{\Theta}_{[1]}, \dots, \hat{\Theta}_{[p-1]}) = 0$  around the true parameter values and dropping higher order terms (Lehmann 1983; Cox and Reid 2004), we get

$$\begin{aligned} & -\frac{1}{n} \begin{bmatrix} \frac{\partial U_{[1]}(\Theta_{[1]}; \mathbf{Y}_{[1]})}{\partial \Theta_{[1]}^T} & & \mathbf{0} \\ \vdots & \ddots & \\ \frac{\partial U_{[K]}(\Theta_{[K]}; \mathbf{Y}_{[K]} | \Theta_{[1]}, \dots, \Theta_{[K-1]})}{\partial \Theta_{[1]}^T} & \dots & \frac{\partial U_{[K]}(\Theta_{[K]}; \mathbf{Y}_{[K]} | \Theta_{[1]}, \dots, \Theta_{[K-1]})}{\partial \Theta_{[K]}^T} \end{bmatrix} \begin{bmatrix} \sqrt{n}(\hat{\Theta}_{[1]} - \Theta_{[1]}) \\ \vdots \\ \sqrt{n}(\hat{\Theta}_{[K]} - \Theta_{[K]}) \end{bmatrix} \\ & \approx \begin{bmatrix} \frac{1}{\sqrt{n}} U_{[1]}(\Theta_{[1]}; \mathbf{Y}_{[1]}) \\ \vdots \\ \frac{1}{\sqrt{n}} U_{[K]}(\Theta_{[K]}; \mathbf{Y}_{[K]} | \Theta_{[1]}, \dots, \Theta_{[K-1]}) \end{bmatrix}. \end{aligned}$$

By the law of large numbers,

$$-\frac{1}{n} \frac{\partial U_{[p]}(\Theta_{[p]}; \mathbf{Y}_{[p]} | \Theta_{[1]}, \dots, \Theta_{[p-1]})}{\partial \Theta_{[q]}^T} = \frac{1}{n} \sum_{m=1}^n -\frac{\partial U_{[p]}(\Theta_{[p]}; \mathbf{y}_{[p]}^{(m)} | \Theta_{[1]}, \dots, \Theta_{[p-1]})}{\partial \Theta_{[q]}^T} \xrightarrow{p} \mathbf{H}_{[p,q]}.$$

By the central limit theorem,

$$\begin{bmatrix} \frac{1}{\sqrt{n}} U_{[1]}(\Theta_{[1]}; \Upsilon_{[1]}) \\ \vdots \\ \frac{1}{\sqrt{n}} U_{[K]}(\Theta_{[K]}; \Upsilon_{[K]} | \Theta_{[1]}, \dots, \Theta_{[K-1]}) \end{bmatrix} = \frac{1}{\sqrt{n}} \begin{bmatrix} \sum_{m=1}^n U_{[1]}(\Theta_{[1]}; \mathbf{y}_{[1]}^{(m)}) \\ \vdots \\ \sum_{m=1}^n U_{[K]}(\Theta_{[K]}; \mathbf{y}_{[K]}^{(m)} | \Theta_{[1]}, \dots, \Theta_{[K-1]}) \end{bmatrix} \xrightarrow{d} \mathbf{U} \sim N(\mathbf{0}, \mathbf{J}),$$

since  $E[U_{[p]}(\Theta_{[p]}; \mathbf{y}_{[p]} | \Theta_{[1]}, \dots, \Theta_{[p-1]})] = 0$  for all  $p$ . According to Lemma 5.2 in Chapter 6 of Lehmann (1998), the limit distribution of  $\sqrt{n}(\hat{\Theta}^* - \Theta^*)$  is that of

$\mathbf{H}^{-1}\mathbf{U}$ , following which the asymptotic normality of  $\hat{\Theta}^*$  is then obtained

$$\sqrt{n}(\hat{\Theta}^* - \Theta^*) \sim N(\mathbf{0}, \mathbf{H}^{-1}\mathbf{J}(\mathbf{H}^{-1})^T).$$

To prove the equation (A.3), we first define the random column vector  $\mathbf{y} = [\mathbf{y}_1; \mathbf{y}_2; \dots; \mathbf{y}_K]$ , where  $\mathbf{y} - \mathbf{F}\boldsymbol{\beta} \sim N(\mathbf{0}, \mathbf{C})$ . The covariance matrix  $\mathbf{C}$  consists of blocks  $\mathbf{C}_{r,s}$  defining cross-covariance between the  $r$ th and  $s$ th profiles. Let  $\mathbf{A}\mathbf{A}^T = \mathbf{C}$  and define a random vector  $\mathbf{u} \sim N(\mathbf{0}, \mathbf{I})$  with the same dimension as  $\mathbf{y}$ , then  $\mathbf{A}\mathbf{u} = \mathbf{y} - \mathbf{F}\boldsymbol{\beta}$ . Write  $\mathbf{A}^T = [\mathbf{A}_1^T, \dots, \mathbf{A}_K^T]$  such that the block matrices satisfy  $\mathbf{A}_r \mathbf{A}_s^T = \mathbf{C}_{r,s}$  and define  $\mathbf{A}_{[p]}^T = [\mathbf{A}_{r_p}^T, \mathbf{A}_{s_p}^T]$ , then we have

$$\mathbf{A}_{[p]} \mathbf{A}_{[q]}^T = \mathbf{C}_{[p,q]} = \begin{bmatrix} \mathbf{C}_{r_p, r_q} & \mathbf{C}_{r_p, s_q} \\ \mathbf{C}_{s_p, r_q} & \mathbf{C}_{s_p, s_q} \end{bmatrix}.$$

The  $p$ th conditional log-likelihood component can be written as ( $p = 1, 2, \dots, K$ )

$$l_{[p]}(\Theta_{[p]}; \mathbf{y}_{[p]} | \Theta_{[1]}, \dots, \Theta_{[p-1]}) = -\frac{1}{2} \left( \log |\mathbf{C}_{[p]}| + (\mathbf{y}_{[p]} - \mathbf{F}_{[p]} \boldsymbol{\beta}_{[p]})^T \mathbf{C}_{[p]}^{-1} (\mathbf{y}_{[p]} - \mathbf{F}_{[p]} \boldsymbol{\beta}_{[p]}) \right),$$

where  $\mathbf{C}_{[p]} = \mathbf{C}_{[p,p]}$  and  $\mathbf{F}_{[p]} = \text{diag}(\mathbf{F}_{r_p}, \mathbf{F}_{s_p})$ . By taking its score function, plugging into (A.2) and after some derivations and simplification, the equation (A.3) can be derived. ■

**Proposition 2.** Under the usual regularity conditions, as  $n \rightarrow \infty$ , estimates of the

original parameters in  $\Theta$  are consistent, i.e.,  $\hat{\Theta} \xrightarrow{p} \Theta$ , and

$$\sqrt{n}(\hat{\Theta} - \Theta) \sim N\left(\mathbf{0}, \mathbf{B}\mathbf{H}^{-1}\mathbf{J}(\mathbf{H}^{-1})^T \mathbf{B}^T\right) \quad (\text{A.4})$$

**Proof:** By the linear relationship  $\hat{\Theta} = \mathbf{B}\hat{\Theta}^*$ , the proposition 2 can be quickly obtained by the delta method. ■

Define  $K \times 1$  vectors  $\boldsymbol{\omega} = [\omega_{[1]}, \omega_{[2]}, \dots, \omega_{[K]}]^T$ ,  $\mathbf{t} = [T_{[1]}, T_{[2]}, \dots, T_{[K]}]^T$ , and  $\boldsymbol{\zeta} = [\zeta_{[1]}(\cdot), \zeta_{[2]}(\cdot), \dots, \zeta_{[K]}(\cdot)]^T$ , whose elements are arranged according to the sequence S. The following proposition is obtained.

**Proposition 3.** Under the usual regularity conditions, as  $n \rightarrow \infty$ , estimates of the cross-correlation factors are consistent, i.e.,  $\hat{\mathbf{t}} \xrightarrow{p} \mathbf{t}$ , and

$$\sqrt{n}(\hat{\mathbf{t}} - \mathbf{t}) \sim N\left(\mathbf{0}, \frac{\partial \boldsymbol{\zeta}}{\partial \boldsymbol{\omega}^T} \mathbf{B}_\omega \mathbf{H}^{-1} \mathbf{J}(\mathbf{H}^{-1})^T \mathbf{B}_\omega^T \frac{\partial \boldsymbol{\zeta}}{\partial \boldsymbol{\omega}}\right) \quad (\text{A.5})$$

where matrix  $\mathbf{B}_\omega$  is defined based on the linear transform  $\hat{\boldsymbol{\omega}} = \mathbf{B}_\omega \hat{\Theta}^*$ .

**Proof:** The proposition 3 is obvious by the continuous mapping theorem and the delta method. ■

## REFERENCES

1. Lehmann, E. L. (1998). Theory of Point Estimation, Wiley, New York.
2. Cox, D. R. and Reid, N. (2004). A note on pseudolikelihood constructed from marginal densities. Biometrika, 91, 729-737.

## B. NOTATION

|                                                            |                                                                                                                                                                                                                                                                           |
|------------------------------------------------------------|---------------------------------------------------------------------------------------------------------------------------------------------------------------------------------------------------------------------------------------------------------------------------|
| $[\mathbf{v}_1; \mathbf{v}_2; \dots; \mathbf{v}_i; \dots]$ | denotes $[\mathbf{v}_1^T, \mathbf{v}_2^T, \dots, \mathbf{v}_i^T, \dots]^T$ , a column vector                                                                                                                                                                              |
| $[p]$                                                      | denotes the index to the $p$ th bivariate GP model (a pair of profiles)                                                                                                                                                                                                   |
| $\mathbf{y}_{[p]}$                                         | responses of the $p$ th model, i.e. $\mathbf{y}_{[p]} = [\mathbf{y}_{r_p}; \mathbf{y}_{s_p}]$                                                                                                                                                                             |
| $\boldsymbol{\beta}_{[p]}$                                 | regression coefficient of the $p$ th model, i.e. $\boldsymbol{\beta}_{[p]} = [\boldsymbol{\beta}_{r_p}^{(s_p)}; \boldsymbol{\beta}_{s_p}^{(r_p)}]$                                                                                                                        |
| $\boldsymbol{\Psi}_{[p]}$                                  | all parameters in the covariance function of the $p$ th model, i.e.<br>$\boldsymbol{\Psi}_{[p]} = [\boldsymbol{\phi}_{r_p}^{(s_p)}; \boldsymbol{\phi}_{s_p}^{(r_p)}; \boldsymbol{\sigma}_{r_p}^{(s_p)}; \boldsymbol{\sigma}_{s_p}^{(r_p)}; \omega_{[p]}; \sigma_M^{[p]}]$ |
| $\omega_{[p]}$                                             | $\omega_{r_p, s_p}$ in the Hypersphere Decomposition of the $p$ th model                                                                                                                                                                                                  |
| $\sigma_M^{[p]}$                                           | measurement error of the $p$ th model, i.e. $\sigma_M^{[p]} = \sigma_M$                                                                                                                                                                                                   |
| $\Theta_{[p]}$                                             | all parameters of the $p$ th model, i.e. $\Theta_{[p]} = [\boldsymbol{\beta}_{[p]}; \boldsymbol{\Psi}_{[p]}]$                                                                                                                                                             |
| $\Theta$                                                   | all parameters of the MGP, i.e. $\Theta = [\boldsymbol{\beta}; \boldsymbol{\phi}; \boldsymbol{\sigma}; \sigma_M; \boldsymbol{\Omega}]$                                                                                                                                    |
| $\Theta^*$                                                 | a collection of the parameters in all bivariate models, i.e.<br>$\Theta^* = [\Theta_{[1]}; \Theta_{[2]}; \dots; \Theta_{[K]}]$                                                                                                                                            |
